# Supplementary material
Source: HighWire-hosted journal article supplement (https://jitc.bmj.com/content/8/2/e000809)
Supplement: inline-supplementary-material-1 [file inline-supplementary-material-1.pdf]

### **B16 melanoma - intracranial**

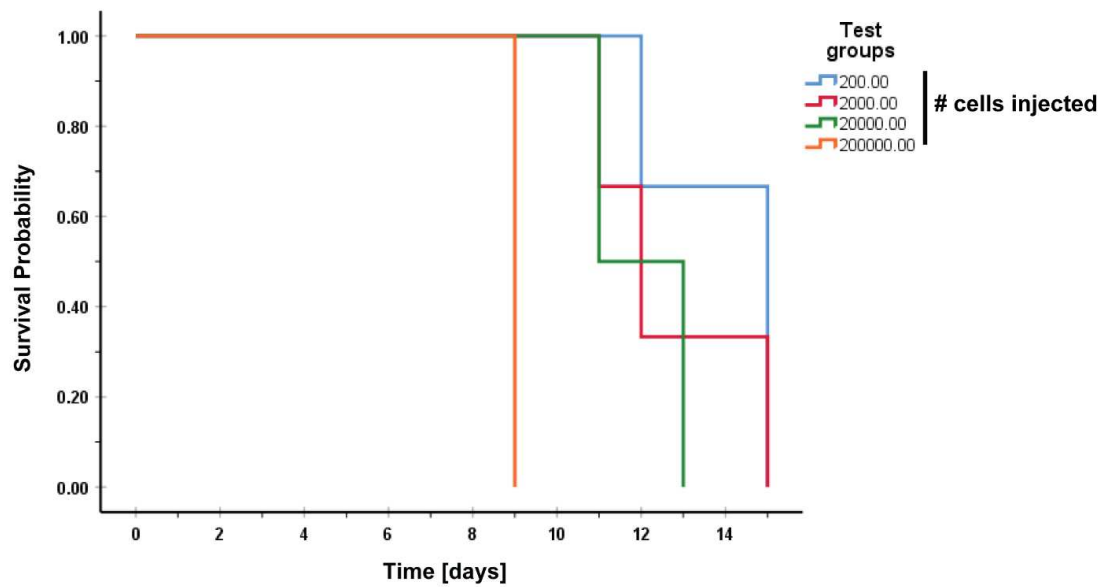

1  
2 **Supplementary Figure 1:** Survival time for mice intracranially injected with B16 (GD2<sup>-</sup>)  
3 melanoma cells ranging from 200 – 200,000 cells.  
4

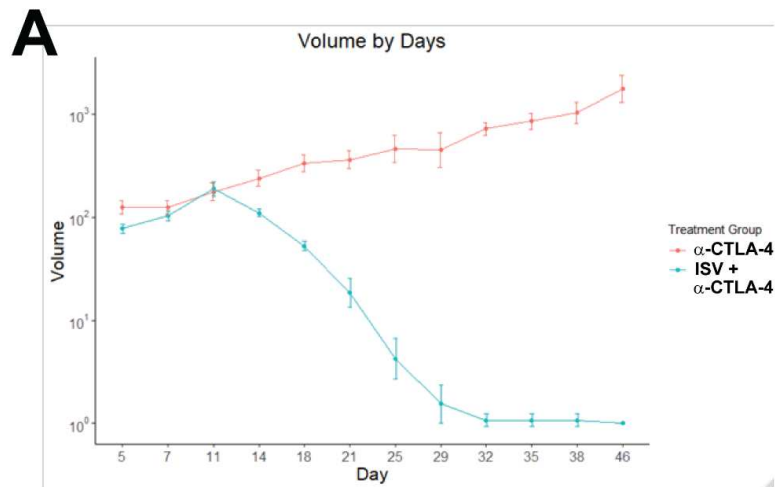

**B**

| Day | Treatment Group | n  | mean_vol | sd_vol | p_value |
|-----|-----------------|----|----------|--------|---------|
| 5   | A               | 8  | 123.99   | 11.92  | <0.001  |
| 5   | B               | 22 | 76.08    | 8.29   |         |
| 7   | A               | 8  | 123.75   | 11.49  | 0.07    |
| 7   | B               | 22 | 102.71   | 12.53  |         |
| 11  | A               | 8  | 174.38   | 21.82  | 0.61    |
| 11  | B               | 22 | 186.77   | 30.45  |         |
| 14  | A               | 8  | 237.90   | 25.58  | <0.001  |
| 14  | B               | 22 | 109.18   | 10.54  |         |
| 18  | A               | 8  | 332.56   | 39.67  | <0.001  |
| 18  | B               | 22 | 51.70    | 5.60   |         |
| 21  | A               | 8  | 360.41   | 45.10  | <0.001  |
| 21  | B               | 22 | 17.36    | 5.80   |         |
| 25  | A               | 8  | 456.20   | 85.36  | <0.001  |
| 25  | B               | 22 | 3.24     | 1.52   |         |
| 29  | A               | 8  | 445.62   | 107.36 | <0.001  |
| 29  | B               | 22 | 0.55     | 0.24   |         |
| 32  | A               | 8  | 715.28   | 62.96  | <0.001  |
| 32  | B               | 22 | 0.08     | 0.01   |         |
| 35  | A               | 8  | 848.70   | 92.72  | <0.001  |
| 35  | B               | 22 | 0.08     | 0.01   |         |
| 38  | A               | 8  | 1022.44  | 152.44 | <0.001  |
| 38  | B               | 22 | 0.08     | 0.01   |         |
| 46  | A               | 8  | 1752.89  | 334.04 | <0.001  |
| 46  | B               | 22 | 0.00     | 0.00   |         |

5  
6  
7  
8  
9

**Supplementary Figure 2: (A)** Log<sub>10</sub>-transformed tumor growth curve of Fig. 1B. **(B)** Log<sub>10</sub> transformed data was used to determine significantly different tumor growth rates at multiple time points. Treatment groups, A: α-CTLA-4 only, B: ISV + α-CTLA-4.

## A B78 melanoma - intracranial (memory)

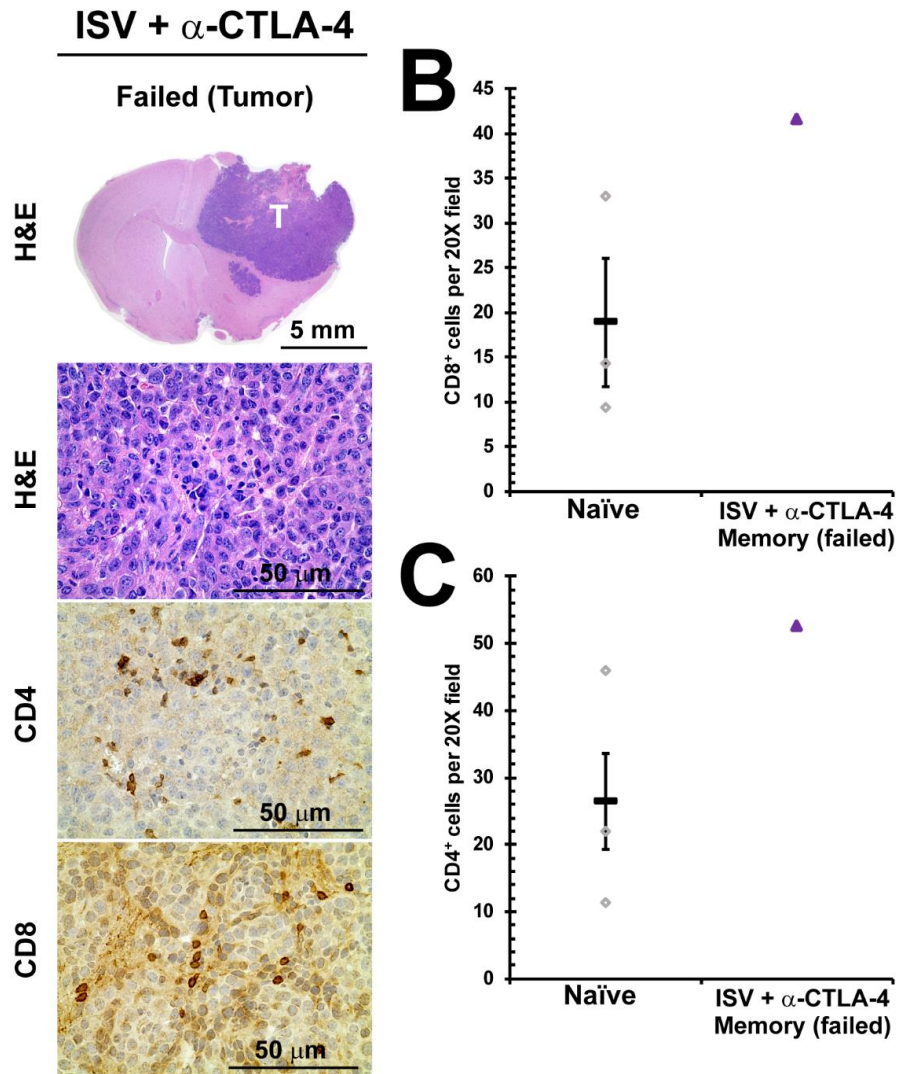

10  
11  
12  
13  
14  
15  
16  
17

**Supplementary Figure 3:** Immune cell analysis of 1 (of 12) mouse that failed to establish immune memory in CNS. (A) Immunohistochemistry representative images of CD4<sup>+</sup> and CD8<sup>+</sup> within developed brain tumor (T: tumor, brown: positive immunolabeling, H&E: hematoxylin and eosin). Quantification of CD8<sup>+</sup> (B) and CD4<sup>+</sup> (C) T-cells demonstrated increases in brain tumor of 1 (of 12) mouse that failed to establish immune memory compared to naïve mice (euthanized due to brain tumor burden, not time-matched).

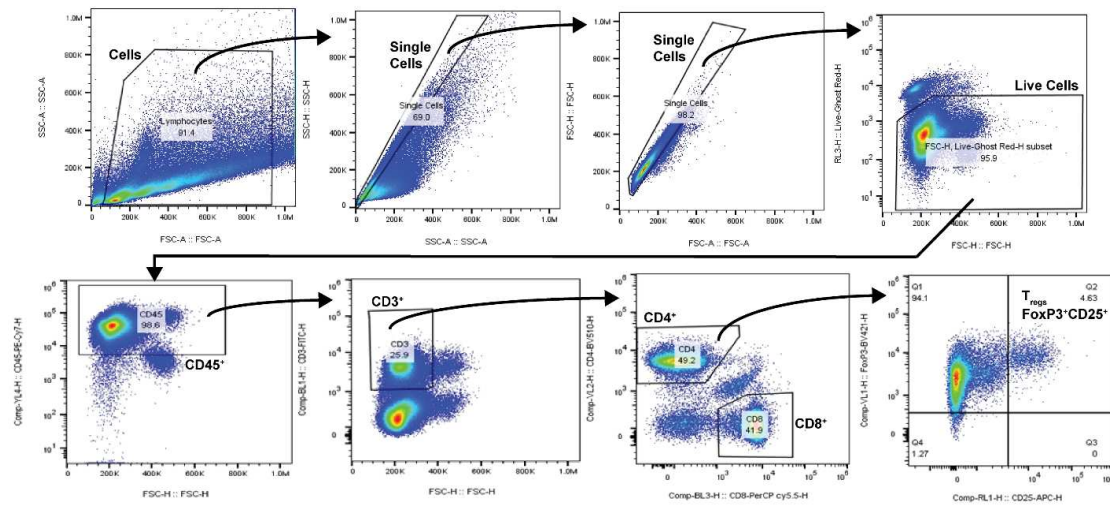

18  
19  
20

**Supplementary Figure 4: Flow cytometry gating strategy.**

## Blood @ 7 days after 1st injection of respective depletion antibody

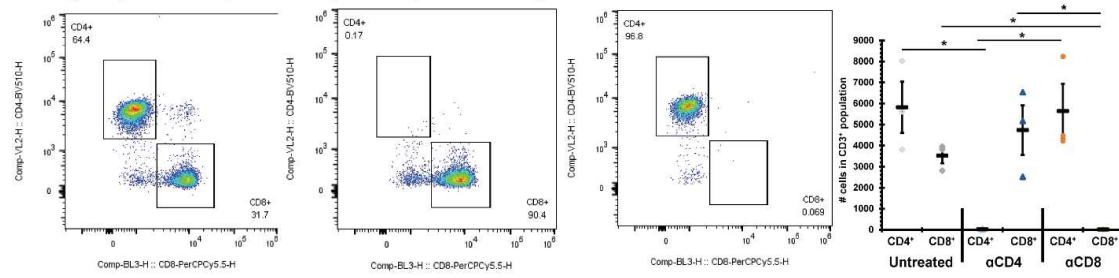

21  
22  
23  
24  
25  
26  
27

**Supplementary Figure 5: Depletion efficiency for  $\alpha$ -CD4 and  $\alpha$ -CD8 antibodies. Injection (i.p.) of  $\alpha$ -CD4 and  $\alpha$ -CD8 antibodies resulted in significant  $>97\%$  depletion of CD4<sup>+</sup> and CD8<sup>+</sup> cells, respectively, in mouse blood 7 days after first administration ( $*p < 0.05$ , mean  $\pm$  S.E.,  $n = 3$  mice in a single animal experiment, ANOVA with post-hoc Bonferroni).**

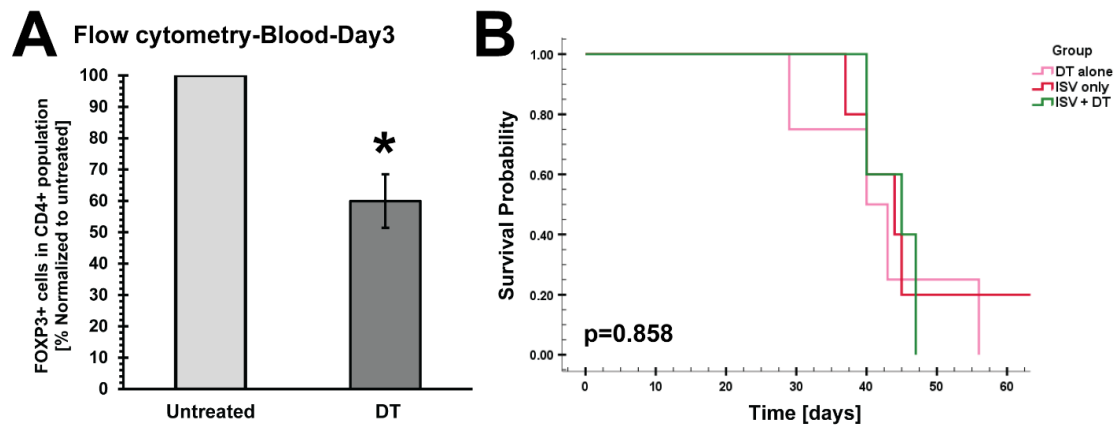

28

29

30 **Supplementary Figure 6: FOXP3<sup>+</sup> cell depletion in DEREK mouse model. (A)** Flow cytometric31 **analysis at day 3 post diphtheria toxin (DT) injection (\* $p < 0.05$ ; mean  $\pm$  S.E.,  $n = 3$  mice total in two**32 **separate animal experiments, Student's  $t$ -test). (B) Survival curve for mice harboring intracranial**33 **and extracranial B78 tumors, and receiving ISV and/or DT treatment ( $p = 0.858$ , Kaplan-Meier,** **$n \geq 4$  in a single animal experiment).**
